# Supplementary material for: Microbiota-Derived Short-Chain Fatty Acids Promote LAMTOR2-Mediated Immune Responses in Macrophages
Source: PubMed Central journal article supplement (PMC7646525; doi:10.1128/msystems.00587-20), 2020-11-03
Supplement: mSystems.00587-20-st001.pdf [file mSystems.00587-20-st001.pdf]

| <b>Name</b>                 | <b>Company</b> | <b>Catalog</b>       |
|-----------------------------|----------------|----------------------|
| DMEM                        | Gibico         | Catalog# 11965-092   |
| MEM                         | Gibico         | Catalog# 31985070    |
| RPMI 1640 Medium            | Gibico         | Catalog# 31870082    |
| Fetal Bovine Serum          | Gibico         | Catalog# 16000-044   |
| Sodium Butyrate             | Sigma Aldrich  | Catalog# 303410-100G |
| Sodium Acetate              | Sigma Aldrich  | Catalog# S2889-250G  |
| Sodium Propionate           | Sigma Aldrich  | Catalog# P1880-100G  |
| Penicillin/streptomycin     | Sigma Aldrich  | Catalog# P4333-100ML |
| Gentamicin                  | Sigma Aldrich  | Catalog# G1397-10ML  |
| Ampicillin                  | Sigma Aldrich  | Catalog# A9518-25G   |
| Neomycin sulfate            | Sigma Aldrich  | Catalog# N6386-100G  |
| Metronidazole               | Sigma Aldrich  | Catalog# M3761-25G   |
| Puromycin                   | Invitrogen     | Catalog# A1113802    |
| CFSE                        | Invitrogen     | Catalog# 65-0850-84  |
| Lipofectamin2000            | Invitrogen     | Catalog# 11668027    |
| Hoechst 33258               | Sigma          | Catalog# 861405      |
| Protease Inhibitor Cocktail | Roche          | Catalog# 4693116001  |
| TRIzol™ Reagent             | Invitrogen     | Catalog# 15596018    |
| Lipopolysaccharide (LPS)    | Sigma Aldrich  | Catalog# L2630-10MG  |
