# Supplementary material for: Microbiota-Derived Short-Chain Fatty Acids Promote LAMTOR2-Mediated Immune Responses in Macrophages
Source: PubMed Central journal article supplement (PMC7646525; doi:10.1128/msystems.00587-20), 2020-11-03
Supplement: mSystems.00587-20-st002.pdf [file mSystems.00587-20-st002.pdf]

| <b>Antibodies</b>               | <b>Company</b>            | <b>Catalog</b>      |
|---------------------------------|---------------------------|---------------------|
| Anti- $\beta$ -actin            | Santa Cruz Biotechnology  | Catalog# sc-47778   |
| Anti-GPR43                      | Santa Cruz Biotechnology  | Catalog# sc-293202  |
| Anti-LAMTOR2                    | Cell Signaling Technology | Catalog# 8145       |
| Anti-p-p44/42 MAPK(Erk1/2)      | Cell Signaling Technology | Catalog# 4370       |
| Anti-p44/42 MAPK(Erk1/2)        | Cell Signaling Technology | Catalog# 4695       |
| Anti-LAMP-1                     | Santa Cruz Biotechnology  | Catalog# sc-20011   |
| Anti-p-JNK                      | Cell Signaling Technology | Catalog# 9255S      |
| Anti-p-p38                      | Cell Signaling Technology | Catalog# 4511T      |
| Anti-F4/80                      | Abcam                     | Catalog# ab111101   |
| Anti-iNOS antibody              | Abcam                     | Catalog# ab15323    |
| Anti- $\beta$ -Tubulin Antibody | Cell Signaling Technology | Catalog# 2146       |
| Anti-CD14                       | BioLegend                 | Catalog# 301804     |
| Anti-CD11b/c                    | Abcam                     | Catalog# ab1211     |
| Anti-Flag                       | Proteintech               | Catalog# 66008-3-lg |
| Goat anti-Mouse (HRP)           | Abcam                     | Catalog# ab6808     |
| Goat Anti-Rabbit (HRP)          | Abcam                     | Catalog# ab97051    |
| Mouse Inflammation Kit          | BD bioscience             | Catalog# 552364     |
| Goat anti-Mouse, Fluor 555      | Invitrogen                | Catalog# A32727     |
| Goat anti-Mouse, Fluor 488      | Invitrogen                | Catalog# A-11001    |
| Goat anti-Rabbit, Fluor 488     | Invitrogen                | Catalog# A-11008    |
