# Supplementary material for: Microbiota-Derived Short-Chain Fatty Acids Promote LAMTOR2-Mediated Immune Responses in Macrophages
Source: PubMed Central journal article supplement (PMC7646525; doi:10.1128/msystems.00587-20), 2020-11-03
Supplement: mSystems.00587-20-st003.pdf [file mSystems.00587-20-st003.pdf]

| Oligonucleotides   | 5'→3'                   |
|--------------------|-------------------------|
| Lamtor2 gRNA       | GAATAATGAGGGATCGCTGCTGG |
| Gpr43 gRNA         | GCACAGTTCCTTGATCCTCACGG |
| Lamtor2-genomic-Fw | GTGGCTAATGTTGCAAGCTG    |
| Lamtor2-genomic-Re | ATACTTGCAAAGTCTGCTCGG   |
| Gpr43-genomic-Fw   | TGCAGCTTAATATCCCGCCC    |
| Gpr43-genomic-Re   | ATCCACACGAAGCGCCAATA    |
| Gapdh-Fw           | GTCAAGGCCGAGAATGGGAA    |
| Gapdh-Re           | CTCGTGGTTCACACCCATCA    |
| TNF $\alpha$ -Fw   | ACTGAACTTCGGGGTGATCG    |
| TNF $\alpha$ -Re   | TTGAGATCCATGCCGTTGGC    |
| i-NOS-Fw           | AAGATGGCCTGGAGGAATGC    |
| i-NOS-Re           | CGTACCGGATGAGCTGTGAA    |
| 1L-1 $\beta$ -Fw   | CATCCAGCTTCAAATCTCGCA   |
| 1L-1 $\beta$ -Re   | GATGAAGGAAAAGAAGGTGCTC  |
| 1L-6-Fw            | ACTTCACAAGTCGGAGGCTTA   |
| 1L-6-Re            | ATCCAGTTTGGTAGCATCCATC  |
| LAMTOR2-Fw         | TGCTAAGCCAAGCCAACACT    |
| LAMTOR2-Re         | GCCTACTTTACTCCATACCATGC |
| MP-1-Fw            | CAACAGACCAAGGCAGCAAAC   |
| MP-1-Re            | GCTAGCTCCTTTTCTAGGCTGAC |
| S100A9-PF          | AGCATAACCACCATCATCGACA  |
